# Supplementary material for: ST-CellSeg: Cell segmentation for imaging-based spatial transcriptomics using multi-scale manifold learning
Source: PubMed Central journal article supplement (PMC11236102; doi:10.1371/journal.pcbi.1012254), 2024-06-27

**S1 Table. The segmentation results of various methods for a more detailed comparison**

We have conducted a comprehensive evaluation of ST-CellSeg alongside other existing cell segmentation methods. In this supplementary material, we present additional figures that showcase the segmentation results of various methods for a more detailed comparison.

|        | Segmentation Results                                                                |
|--------|-------------------------------------------------------------------------------------|
| SpaGCN | 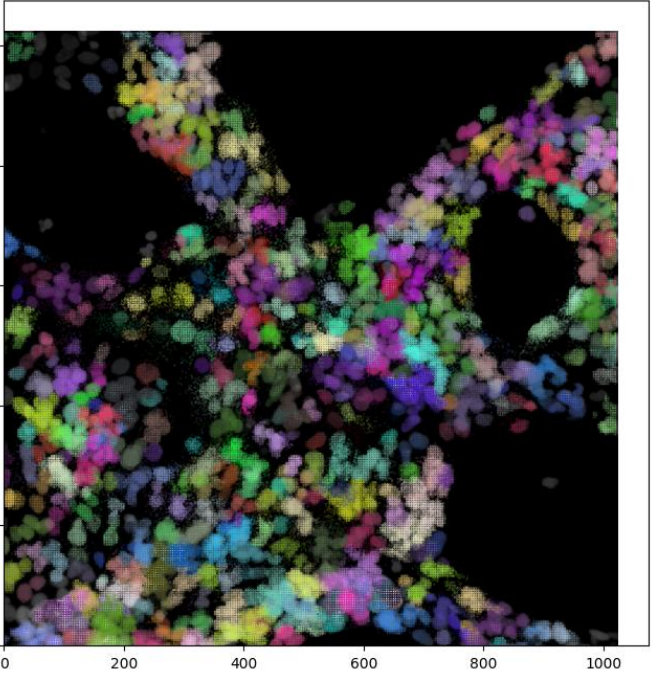 |

STAGATE

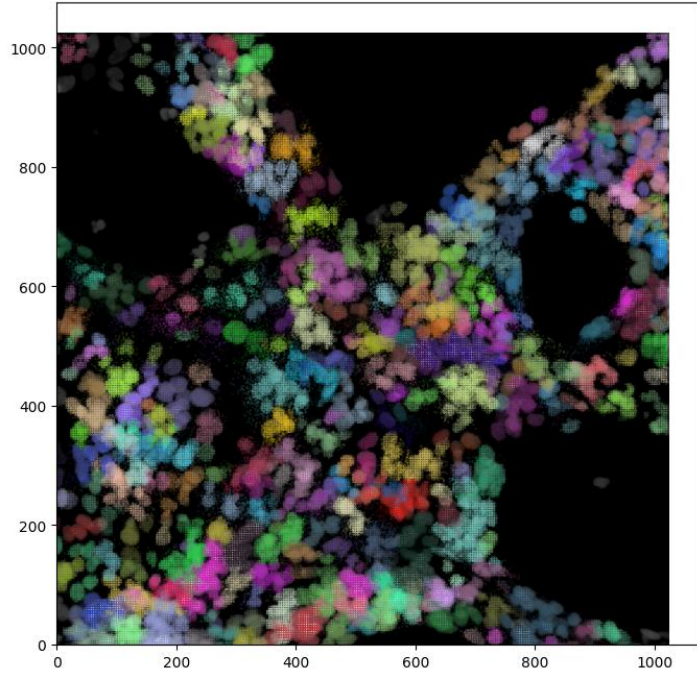

Baysor

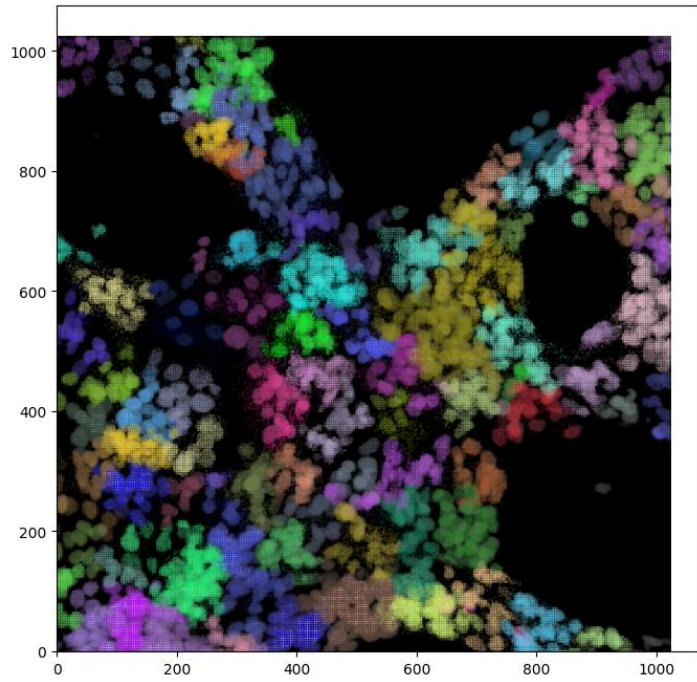

Cellpose

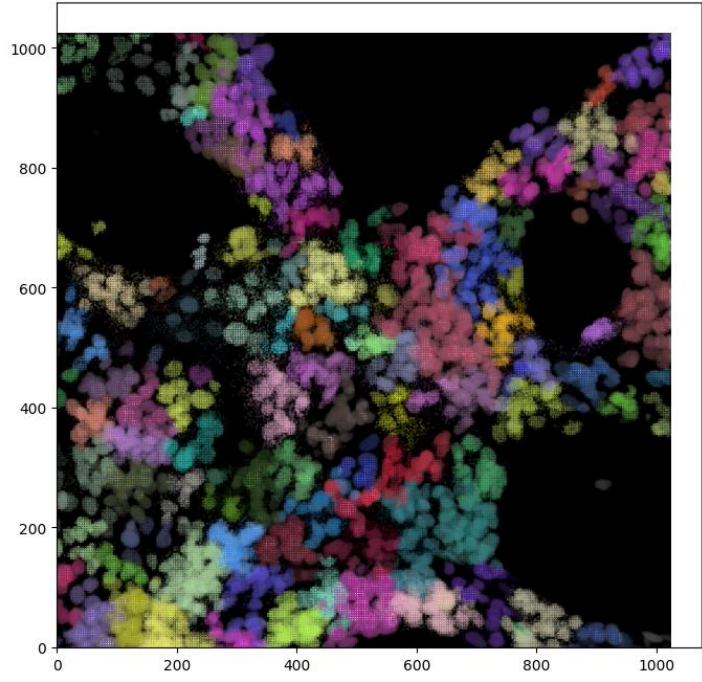

StarDist

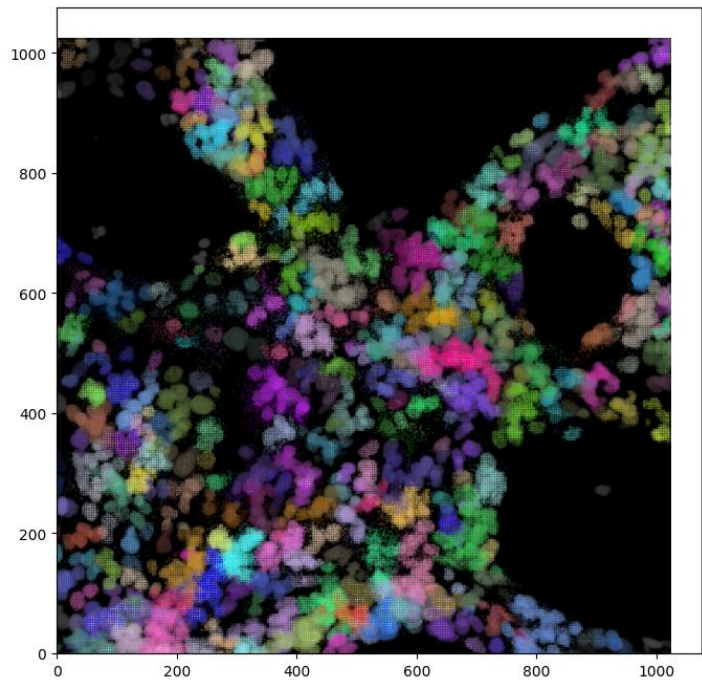

Supplement: pcbi.1012254.s001.pdf [file pcbi.1012254.s001.pdf]
