# Supplementary material for: ST-CellSeg: Cell segmentation for imaging-based spatial transcriptomics using multi-scale manifold learning
Source: PubMed Central journal article supplement (PMC11236102; doi:10.1371/journal.pcbi.1012254), 2024-06-27
Supplement: pcbi.1012254.s002.pdf [file pcbi.1012254.s002.pdf]

**S2 Table. Comparison of cell segmentation times for different methods on different spatial transcriptomics datasets**

In this supplementary material section, we provide additional details on the runtime comparison of cell segmentation methods using different computational platforms. The table presented below showcases the runtime performance of ST-CellSeg (CPU), ClusterMap (CPU), SpaGCN (GPU), STAGATE (GPU), Baysor (CPU), Cellpose (GPU), and StarDist (GPU) on two spatial transcriptomics datasets: STARmap 903-gene data and MERFISH 140-gene data.

|                       | ST-CellSeg (CPU) | ClusterMap (CPU) | SpaGCN (GPU)  | STAGATE (GPU) | Baysor (CPU)  | Cellpose (GPU) | StarDist (GPU) |
|-----------------------|------------------|------------------|---------------|---------------|---------------|----------------|----------------|
| STARmap 903-gene data | 3min<br>5s       | 3min<br>42s      | 2min<br>27s   | 2min<br>39s   | 4min<br>1s    | 3min<br>7s     | 3min<br>21s    |
| STARmap 8-gene data   | 284min<br>28s    | 324min<br>48s    | 212min<br>31s | 225min<br>16s | 438min<br>8s  | 290min<br>54s  | 256min<br>48s  |
| MERFISH 140-gene data | 195min<br>2s     | 212min<br>38s    | 129min<br>49s | 135min<br>19s | 312min<br>17s | 180min<br>19s  | 194min<br>31s  |
